# Supplementary material for: Whey Protein Hydrolysate Renovates Age-Related and Scopolamine-Induced Cognitive Impairment
Source: MDPI journal article supplement (doi:10.3390/nu15051228), 2023-02-28
Supplement: s1 [file s1]

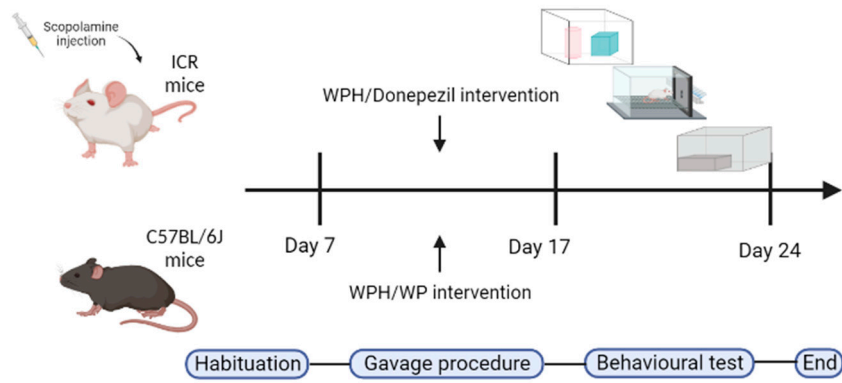

**Figure S1.** The scheme of animal experiment design.

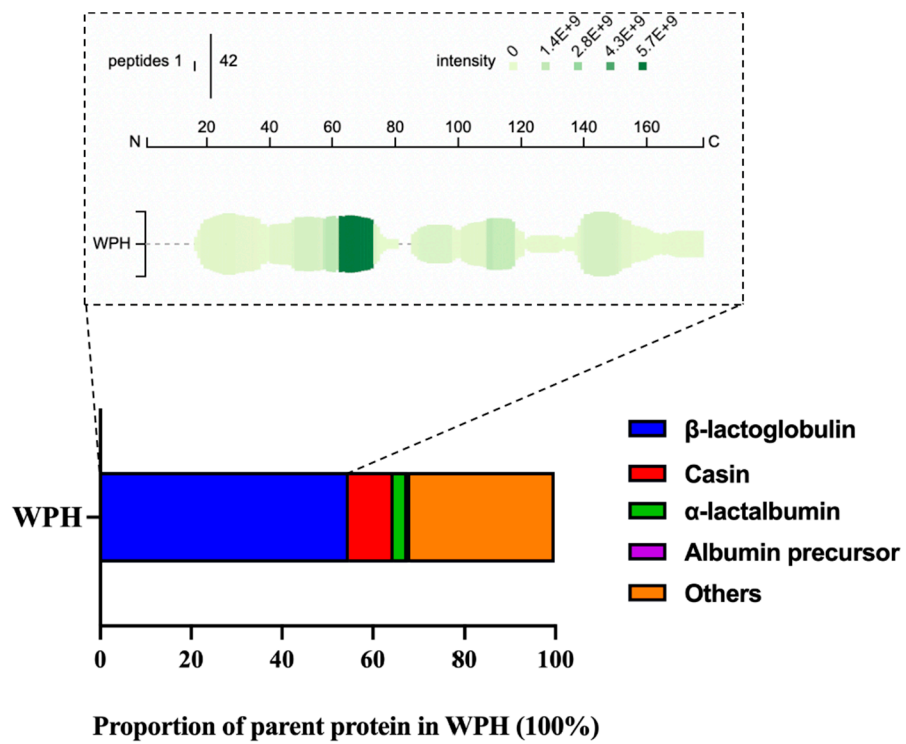

**Figure S2.** The proportion of parent protein for WPH and the peptide profile of  $\beta$ -Lactoglobulin in WPH.

**A**

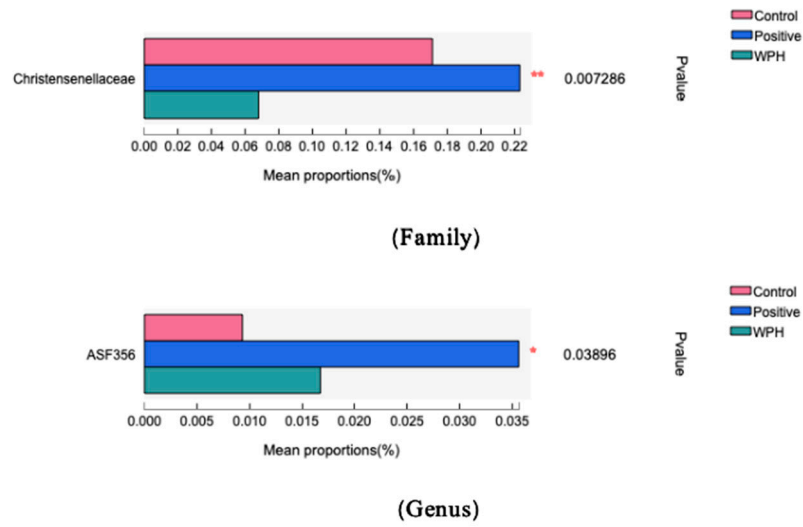

**B**

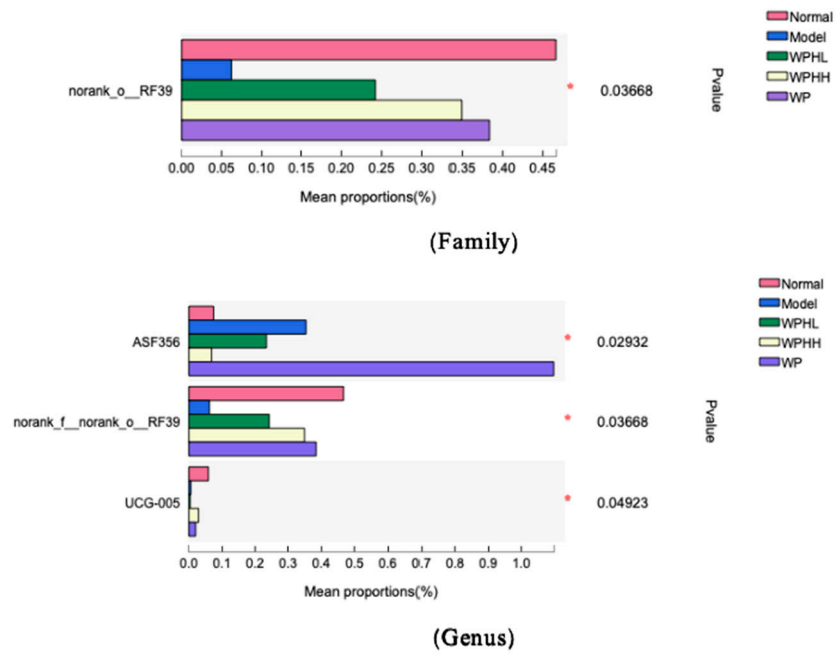

**Figure S3.** Relative abundances of genera that showed significant differences among groups at different taxonomic levels were obtained by one-way ANOVA. A represents scopolamine-induced ICR mice; B represents old-aged C57BL/6J mice. \* and \*\* mean  $p < 0.05$  and  $p < 0.01$  compared to the model group.

**A**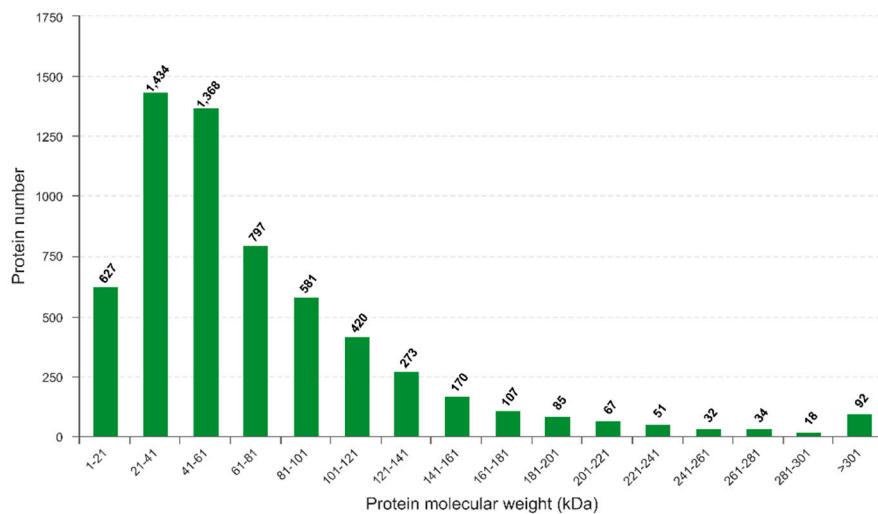**B**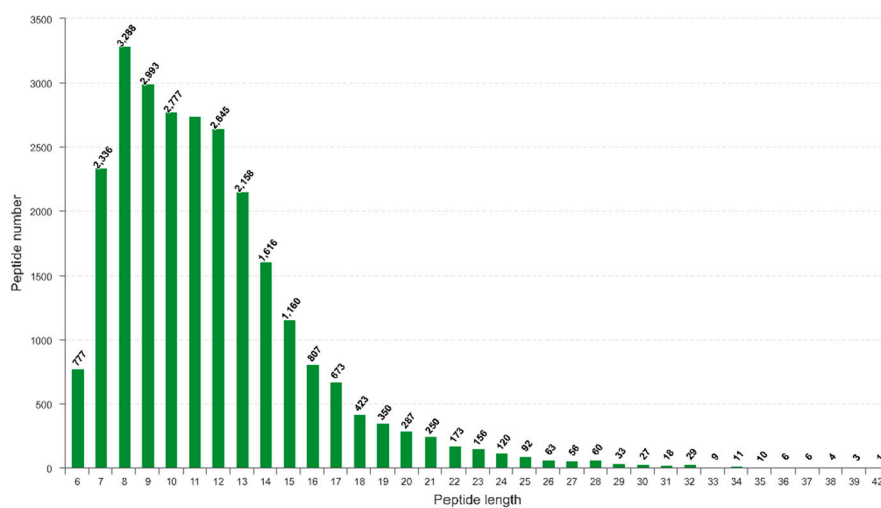

**Figure S4.** Protein molecular weight distribution (A) and peptide length distribution (B) in identified protein.

**A**

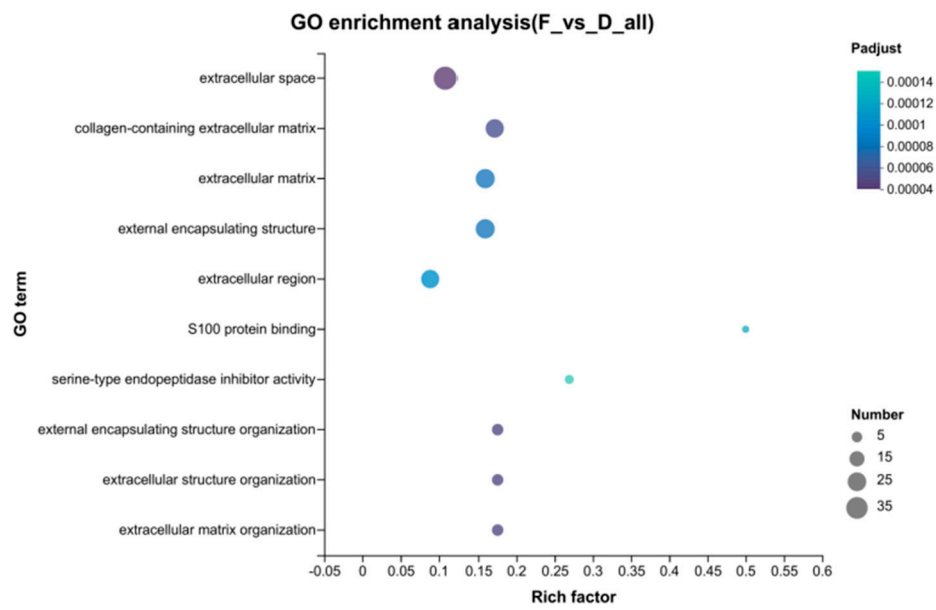

**B**

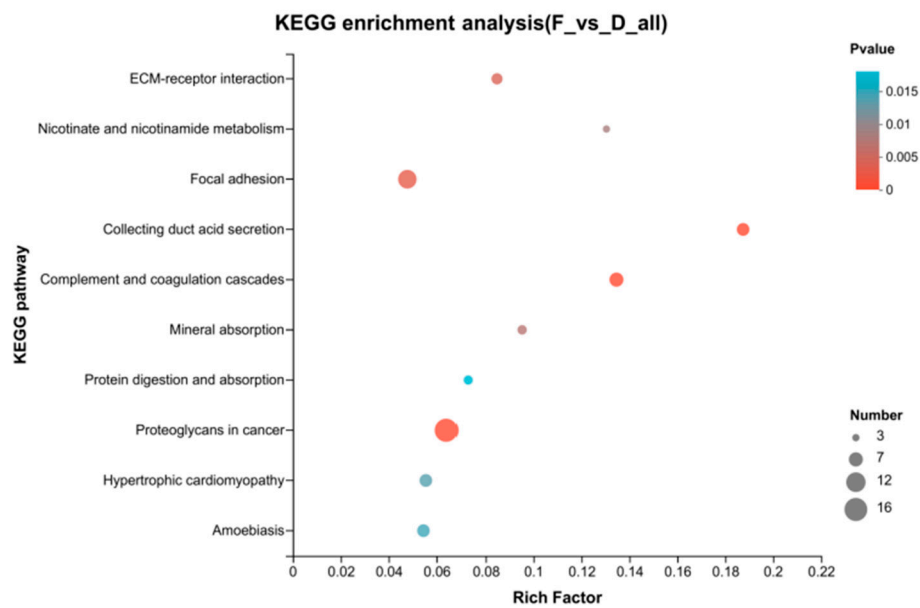

**Figure S5.** Bubble chart of differentially expressed proteins in GO enrichment analysis (A) and KEGG enrichment analysis (B).

**Table S1.** The mobile phase gradient of LC-MS/MS analysis

| Time | Flow Rate (μL/min) | Solvent A (%) | Solvent B (%) |
|------|--------------------|---------------|---------------|
| 0    | 180                | 95            | 5             |
| 5    | 180                | 95            | 5             |
| 45   | 180                | 65            | 35            |
| 50   | 180                | 0             | 100           |
| 54   | 180                | 0             | 100           |
| 55   | 180                | 95            | 5             |
| 70   | 180                | 95            | 5             |

**Table S2.** The Gene Ontology (GO) enrichment information of WPH group and model group

| GO ID      | GO Term                                       | Category | <i>p</i> -Value | Count |
|------------|-----------------------------------------------|----------|-----------------|-------|
| GO:0005615 | extracellular space                           | CC       | 0.000040535     | 35    |
| GO:0045229 | external encapsulating structure organization | BP       | 0.000049409     | 10    |
| GO:0043062 | extracellular structure organization          | BP       | 0.000049409     | 10    |
| GO:0030198 | extracellular matrix organization             | BP       | 0.000049409     | 10    |
| GO:0062023 | collagen-containing extracellular matrix      | CC       | 0.000055591     | 23    |
| GO:0031012 | extracellular matrix                          | CC       | 0.000083263     | 25    |
| GO:0030312 | external encapsulating structure              | CC       | 0.000083263     | 25    |
| GO:0005576 | extracellular region                          | CC       | 0.000099324     | 23    |
| GO:0044548 | S100 protein binding                          | MF       | 0.000122701     | 5     |
| GO:0004867 | serine-type endopeptidase inhibitor activity  | MF       | 0.000145004     | 7     |
| GO:0005201 | extracellular matrix structural constituent   | MF       | 0.000153598     | 5     |
| GO:0050840 | extracellular matrix binding                  | MF       | 0.000165506     | 6     |
| GO:0004866 | endopeptidase inhibitor activity              | MF       | 0.000225268     | 8     |
| GO:0030414 | peptidase inhibitor activity                  | MF       | 0.000240522     | 8     |
| GO:0061135 | endopeptidase regulator activity              | MF       | 0.00035769      | 8     |
| GO:0002020 | protease binding                              | MF       | 0.00035769      | 8     |
| GO:0005604 | basement membrane                             | CC       | 0.000370521     | 7     |
| GO:0061134 | peptidase regulator activity                  | MF       | 0.000817873     | 8     |
| GO:0031214 | biomineral tissue development                 | BP       | 0.000893933     | 5     |
| GO:0110148 | biomineralization                             | BP       | 0.000893933     | 5     |

**Table S3.** The KEGG pathway of differentially expressed proteins (DEPs)

| KEGG Description                       | Pathway ID | DEPs<br>Number | <i>p</i> -Value |
|----------------------------------------|------------|----------------|-----------------|
| Proteoglycans in cancer                | mmu05205   | 16             | 0.000008589     |
| Collecting duct acid secretion         | mmu04966   | 6              | 0.000018824     |
| Complement and coagulation cascades    | mmu04610   | 7              | 0.000035606     |
| Focal adhesion                         | mmu04510   | 11             | 0.00277315      |
| ECM-receptor interaction               | mmu04512   | 5              | 0.004074328     |
| Mineral absorption                     | mmu04978   | 4              | 0.006696747     |
| Nicotinate and nicotinamide metabolism | mmu00760   | 3              | 0.007851817     |
| Hypertrophic cardiomyopathy            | mmu05410   | 6              | 0.01315984      |
| Amoebiasis                             | mmu05146   | 6              | 0.014311603     |
| Protein digestion and absorption       | mmu04974   | 4              | 0.017071603     |
